# Supplementary material
Source: PubMed Central journal article supplement (PMC7226290)
Supplement: jamaophthalmol-138-756-s001.pdf [file jamaophthalmol-138-756-s001.pdf]

## Supplementary Online Content

Patel N, Stagg BC, Swenor BK, Zhou Y, Talwar N, Ehrlich JR. Association of co-occurring dementia and self-reported visual impairment with activity limitations in older adults. *JAMA Ophthalmol*. Published online May 14, 2020. doi:10.1001/jamaophthalmol.2020.1562

**eTable 1.** Poisson model of mobility activity scale as a function of vision and dementia status

**eTable 2.** Poisson model of self-care activity scale as a function of vision and dementia status

**eTable 3.** Poisson model of household activity scale as a function of vision and dementia status

This supplementary material has been provided by the authors to give readers additional information about their work.

**eTable 1. Poisson model of mobility activity scale as a function of vision and dementia status**

|                                               | <b>Estimate</b> | <b>95% CI</b> | <b>P Value</b> |
|-----------------------------------------------|-----------------|---------------|----------------|
| <b>Self-Reported VI</b>                       |                 |               |                |
| No VI                                         | Reference       |               |                |
| VI                                            | -0.08           | -.08, -.08    | <.001          |
| <b>Dementia Classification</b>                |                 |               |                |
| No Dementia                                   | Reference       |               |                |
| Possible Dementia                             | -0.06           | -.06, -.06    | <.001          |
| Probable Dementia                             | -0.12           | -.12, -.12    | <.001          |
| <b>VI-Dementia Interaction</b>                |                 |               |                |
| VI + Possible Dementia                        | -0.04           | -.05, -.04    | <.001          |
| VI + Probable Dementia                        | -0.17           | -.17, -.16    | <.001          |
| <b>Age (years)</b>                            |                 |               |                |
| 65-69                                         | Reference       |               |                |
| 70-74                                         | 0.00            | .00, .00      | <.001          |
| 75-79                                         | 0.00            | .00, .00      | <.001          |
| 80-84                                         | -0.03           | -.03, -.03    | <.001          |
| 85-89                                         | -0.06           | -.06, -.06    | <.001          |
| 90+                                           | -0.17           | -.17, -.17    | <.001          |
| <b>Race/Ethnicity</b>                         |                 |               |                |
| White, non-Hispanic                           | Reference       |               |                |
| Black, non-Hispanic                           | -0.01           | -.01, -.01    | <.001          |
| Other, non-Hispanic                           | -0.01           | -.01, -.01    | <.001          |
| Hispanic                                      | 0.01            | .01, .01      | <.001          |
| <b>Education</b>                              |                 |               |                |
| Less than HS diploma                          | 0.01            | .01, .01      | <.001          |
| HS diploma                                    | 0.01            | .01, .02      | <.001          |
| Some college                                  | 0.00            | .00, .00      | <.001          |
| College degree                                | Reference       |               |                |
| <b>Gender</b>                                 |                 |               |                |
| Male                                          | Reference       |               |                |
| Female                                        | -0.02           | -.02, -.02    | <.001          |
| <b>Family Income Quartile</b>                 |                 |               |                |
| <\$17,000                                     | -0.06           | -.06, -.06    | <.001          |
| \$17,000-\$30,999                             | -0.03           | -.03, -.03    | <.001          |
| \$31,000-\$59,999                             | -0.00           | -.00, -.00    | <.001          |
| ≥\$60,000                                     | Reference       |               |                |
| <b>History of Cataract Surgery</b>            |                 |               |                |
| No                                            | Reference       |               |                |
| Yes                                           | -0.01           | -.01, -.02    | <.001          |
| <b>Depressive Symptoms</b>                    |                 |               |                |
| No                                            | Reference       |               |                |
| Yes                                           | -0.14           | -.14, -.14    | <.001          |
| <b>Body Mass Index (per kg/m<sup>2</sup>)</b> | -0.00           | -.00, -.00    | <.001          |
| <b>Comorbidities (per condition)</b>          | -0.03           | -.03, -.03    | <.001          |

CI: confidence interval, HS: high school, VI: vision impairment

**eTable 2. Poisson model of self-care activity scale as a function of vision and dementia status**

|                                               | <b>Estimate</b> | <b>95% CI</b> | <b>P Value</b> |
|-----------------------------------------------|-----------------|---------------|----------------|
| <b>Self-Reported VI</b>                       |                 |               |                |
| No VI                                         | Reference       |               |                |
| VI                                            | -0.05           | -.05, -.05    | <.001          |
| <b>Dementia Classification</b>                |                 |               |                |
| No Dementia                                   | Reference       |               |                |
| Possible Dementia                             | -0.04           | -.04, -.04    | <.001          |
| Probable Dementia                             | -0.08           | -.09, -.08    | <.001          |
| <b>VI-Dementia Interaction</b>                |                 |               |                |
| VI + Possible Dementia                        | -0.06           | -.06, -.06    | <.001          |
| VI + Probable Dementia                        | -0.14           | -.14, -.14    | <.001          |
| <b>Age (years)</b>                            |                 |               |                |
| 65-69                                         | Reference       |               |                |
| 70-74                                         | -0.00           | -.00, -.00    | <.001          |
| 75-79                                         | -0.01           | -.01, -.01    | <.001          |
| 80-84                                         | -0.03           | -.03, -.03    | <.001          |
| 85-89                                         | -0.06           | -.06, -.06    | <.001          |
| 90+                                           | -0.13           | -.13, -.13    | <.001          |
| <b>Race/Ethnicity</b>                         |                 |               |                |
| White, non-Hispanic                           | Reference       |               |                |
| Black, non-Hispanic                           | 0.01            | .01, .01      | <.001          |
| Other, non-Hispanic                           | 0.01            | .01, .01      | <.001          |
| Hispanic                                      | 0.02            | .02, .02      | <.001          |
| <b>Education</b>                              |                 |               |                |
| Less than HS diploma                          | 0.02            | .02, .02      | <.001          |
| HS diploma                                    | 0.01            | .01, .01      | <.001          |
| Some college                                  | 0.00            | .00, .00      | <.001          |
| College degree                                | Reference       |               |                |
| <b>Gender</b>                                 |                 |               |                |
| Male                                          | Reference       |               |                |
| Female                                        | -0.02           | -.02, -.02    | <.001          |
| <b>Family Income Quartile</b>                 |                 |               |                |
| <\$17,000                                     | -0.03           | -.03, -.02    | <.001          |
| \$17,000-\$30,999                             | -0.01           | -.01, -.01    | <.001          |
| \$31,000-\$59,999                             | -0.00           | -.00, -.00    | <.001          |
| ≥\$60,000                                     | Reference       |               |                |
| <b>History of Cataract Surgery</b>            |                 |               |                |
| No                                            | Reference       |               |                |
| Yes                                           | -0.01           | -.01, -.01    | <.001          |
| <b>Depressive Symptoms</b>                    |                 |               |                |
| No                                            | Reference       |               |                |
| Yes                                           | -0.09           | -.09, -.09    | <.001          |
| <b>Body Mass Index (per kg/m<sup>2</sup>)</b> | -0.00           | -.00, -.00    | <.001          |
| <b>Comorbidities (per condition)</b>          | -0.02           | -.02, -.02    | <.001          |

CI: confidence interval, HS: high school, VI: vision impairment

**eTable 3. Poisson model of household activity scale as a function of vision and dementia status**

|                                               | <b>Estimate</b> | <b>95% CI</b> | <b>P Value</b> |
|-----------------------------------------------|-----------------|---------------|----------------|
| <b>Self-Reported VI</b>                       |                 |               |                |
| No VI                                         | Reference       |               |                |
| VI                                            | -0.10           | -.10, -.10    | <.001          |
| <b>Dementia Classification</b>                |                 |               |                |
| No Dementia                                   | Reference       |               |                |
| Possible Dementia                             | -0.05           | -.05, -.05    | <.001          |
| Probable Dementia                             | -0.23           | -.23, -.23    | <.001          |
| <b>VI-Dementia Interaction</b>                |                 |               |                |
| VI + Possible Dementia                        | -0.17           | -.17, -.16    | <.001          |
| VI + Probable Dementia                        | -0.10           | -.10, -.10    | <.001          |
| <b>Age (years)</b>                            |                 |               |                |
| 65-69                                         | Reference       |               |                |
| 70-74                                         | 0.01            | .01, .01      | <.001          |
| 75-79                                         | 0.02            | .02, .02      | <.001          |
| 80-84                                         | -0.01           | -.01, -.01    | <.001          |
| 85-89                                         | -0.04           | -.04, -.04    | <.001          |
| 90+                                           | -0.12           | -.12, -.12    | <.001          |
| <b>Race/Ethnicity</b>                         |                 |               |                |
| White, non-Hispanic                           | Reference       |               |                |
| Black, non-Hispanic                           | -0.01           | -.01, -.01    | <.001          |
| Other, non-Hispanic                           | -0.02           | -.02, -.02    | <.001          |
| Hispanic                                      | 0.01            | .01, .01      | <.001          |
| <b>Education</b>                              |                 |               |                |
| Less than HS diploma                          | -0.01           | -.01, -.01    | <.001          |
| HS diploma                                    | 0.00            | .00, .00      | <.001          |
| Some college                                  | 0.00            | .00, .00      | <.001          |
| College degree                                | Reference       |               |                |
| <b>Gender</b>                                 |                 |               |                |
| Male                                          | Reference       |               |                |
| Female                                        | -0.03           | -.03, -.03    | <.001          |
| <b>Family Income Quartile</b>                 |                 |               |                |
| <\$17,000                                     | -0.05           | -.05, -.05    | <.001          |
| \$17,000-\$30,999                             | -0.02           | -.02, -.02    | <.001          |
| \$31,000-\$59,999                             | 0.00            | .00, .00      | <.001          |
| ≥\$60,000                                     | Reference       |               |                |
| <b>History of Cataract Surgery</b>            |                 |               |                |
| No                                            | Reference       |               |                |
| Yes                                           | -0.01           | -.01, -.01    | <.001          |
| <b>Depressive Symptoms</b>                    |                 |               |                |
| No                                            | Reference       |               |                |
| Yes                                           | -0.12           | -.12, -.12    | <.001          |
| <b>Body Mass Index (per kg/m<sup>2</sup>)</b> | -0.00           | -.00, -.00    | <.001          |
| <b>Comorbidities (per condition)</b>          | -0.01           | -.01, -.01    | <.001          |

CI: confidence interval, HS: high school, VI: vision impairment
